Anesthesiology  
67:605, 1987

*In Reply:*—In response to the letter by Dr. Howard Zauder, I wholeheartedly agree that there probably exists a common relationship between lesions of the central nervous system, which includes near-drowning, and depolarizing muscle relaxants. The report was not meant to suggest that succinylcholine-induced hyperkalemia following near-drowning is a distinct pathophysiologic entity. It was reported to remind us that we should

be cautious in using depolarizing muscle relaxants in all central nervous system disorders.

TIMOTHY TONG, M.D.

Associate Director

Pediatric Intensive Care Unit

Children's Health Center of St. Joseph's Hospital  
Phoenix, Arizona 85013

(Accepted for publication June 23, 1987.)

Anesthesiology  
67:605, 1987

### The Inhibition of Stress-induced Beta-endorphin Secretion by Histamine Receptor Antagonists

*To the Editor:*—The article of Walsh *et al.*<sup>1</sup> presents data showing that the increased level of plasma beta-endorphin during preoperative stress is abolished by premedication with diazepam, diphenhydramine, or meperidine, while the plasma concentration of ACTH was affected neither by preoperative stress nor by the premedication drugs. The authors suggested that synthesis or release of beta-endorphin was inhibited and/or the stressful stimuli was suppressed by the drugs.

Recent work by our group, concerning the involvement of neuronal histamine in the mediation of stress-induced release of ACTH and beta-endorphin in rats (unpublished observations),<sup>2</sup> is in agreement with the results obtained by Walsh *et al.* We found that restraint stress, which is believed to have both a physical and an emotional component, increased the plasma levels of ACTH and beta-endorphin. Systemical administration of the H<sub>1</sub>-receptor antagonists mepyramine and SKF-93944 abolished the beta-endorphin response to stress, but had no effect on the ACTH response. Since SKF-93944 does not cross the blood-brain barrier,<sup>3</sup> it appears that the beta-endorphin inhibiting effect of the H<sub>1</sub>-antagonists is not due to unspecific central sedation, but is rather caused by specific activation of H<sub>1</sub>-receptors.

In contrast to the effect of the H<sub>1</sub>-antagonists, blockade of H<sub>2</sub>-receptors by systemic infusion of cimetidine or ranitidine only inhibited the beta-endorphin response to stress 50%, whereas the ACTH response was almost totally blocked. The dissociation between the release of beta-endorphin and ACTH in response to

stress, as described by Walsh *et al.*, is somewhat unexpected considering the common synthetic pathway for the two hormones which are derived from the same precursor molecule, proopiomelanocortin. However, this pattern of dissociated ACTH and beta-endorphin secretion was also present in our animal studies.

FLEMMING W. BACH, M.D.

Department of Psychiatry

Rigshospitalet

Copenhagen, Denmark

ULRICH KNIGGE, M.D.

JØRGEN WARBERG, M.D., PH.D.,

Department of Medical Physiology C

University of Copenhagen

Denmark

#### REFERENCES

1. Walsh J, Puig MM, Lovitz MA, Turndorf H: Premedication abolishes the increase in plasma beta-endorphin observed in the immediate preoperative period. *ANESTHESIOLOGY* 66:402-405, 1987
2. Knigge U, Matzen S, Bach FW, Bang P, Warberg J: Effect of histamine receptor blockade on stress-induced release of prolactin, beta-endorphin, and catecholamines in male rats. *Neuroendocrine Perspectives*, Vol. 5. Edited by Müller EE, Macleod RM. Amsterdam, Elsevier, 1986, pp. 297-301
3. Durant CJ, Ganellin CR, Griffiths R, Harvey CA, Ife RJ, Owen DAA, Parsons ME, Sach GS: SK&F 93944, a potent H<sub>1</sub>-receptor histamine antagonist with negligible ability to penetrate into the central nervous system. *Br J Pharmacol* 82:232P, 1984

(Accepted for publication June 25, 1987.)
